# Supplementary material for: Heat stress analysis suggests a genetic basis for tolerance in Macrocystis pyrifera across developmental stages
Source: PubMed Central journal article supplement — Commun Biol. 2024 Sep 15;7:1147. doi: 10.1038/s42003-024-06800-7 (PMC11402984; doi:10.1038/s42003-024-06800-7), 2024-09-15
Supplement: 42003_2024_6800_MOESM1_ESM.pdf [file 42003_2024_6800_MOESM1_ESM.pdf]

## **Description of Additional Supplementary Files**

File name: Supplementary Data 1

Description: This is an excel document that contains the correspondence between the gametophytes' names and the SRA runs in the NCBI repository.

File name: Supplementary data 2

Description: This is an excel document that contains the raw fluorescence intensity values extracted from IVIS imaging.
